# Supplementary material for: Modeling and Experimental Studies on Carbon Dioxide Absorption with Sodium Hydroxide Solution in a Rotating Zigzag Bed
Source: MDPI journal article supplement (doi:10.3390/pr10030614), 2022-03-21
Supplement: s1 [file s1]

Supplementary material

# Modeling and Experimental Studies on Carbon Dioxide Absorption with Sodium Hydroxide Solution in a Rotating Zigzag Bed

Zhibang Liu <sup>1</sup>, Arash Esmaeili <sup>1</sup>, Hanxiao Zhang <sup>1</sup>, Dan Wang <sup>2,3</sup>, Yuan Lu <sup>4</sup> and Lei Shao <sup>1,\*</sup>

<sup>1</sup> Research Center of the Ministry of Education for High Gravity Engineering and Technology, Beijing University of Chemical Technology, Beijing 100029, China; 2019400002@mail.buct.edu.cn (Z.L.); ar.esmaeli@mail.buct.edu.cn (A.E.); 2018200070@mail.buct.edu.cn (H.Z.)

<sup>2</sup> State Key Laboratory of Petroleum Pollution Control, Beijing 102206, China; wang-dan@cnpc.com.cn

<sup>3</sup> CNPC Research Institute of Safety and Environmental Technology, Beijing 102206, China

<sup>4</sup> CenerTech Oilfield Chemical Co., Ltd., Tianjin 300450, China; luyuan2@cnooc.com.cn

\* Correspondence: shaol@mail.buct.edu.cn; Tel.: +86-10-6442 1706

It can be calculated from  $k_L$  and  $k_G$  in Table S1 that the contribution of the gas-side mass transfer resistance to the total mass transfer resistance cannot be ignored. However, the main mass transfer resistance still lies on the liquid side. Compared with the  $k_G$  in Reference [10], the  $k_G$  in our study was smaller because the inlet gas flow rate was two orders of magnitude smaller than that in Reference [10].

The difference in the value of  $k_L$  and  $a$  between this study and Reference [10] resulted from different experimental conditions. As for  $k_L$ , the value in this study was higher than that in Reference [10] because NaOH concentration and temperature of NaOH solution used in this study were higher than those in Reference [10]. In terms of  $a$ , the value in this study was close to that in Reference [10] due to a similar structure.

It can be seen from Table S2 that the liquid-side mass-transfer coefficient and gas-liquid effective interfacial area in zone II were larger than those in zone I and III, and thus liquid-side volumetric mass-transfer coefficient in zone II was much higher than that in zone I and III, suggesting that the main contribution of liquid-side mass transfer was from zone II. The above conclusions in this study agree with those in Wang et al.'s research [2].

**Citation:** Liu, Z.; Esmaeili, A.; Zhang, H.; Wang, D.; Lu, Y.; Shao, L. Modeling and Experimental Studies on Carbon Dioxide Absorption with Sodium Hydroxide Solution in a Rotating Zigzag Bed. *Processes* **2022**, *10*, 614. <https://doi.org/10.3390/pr10030614>

Academic Editors: Elio Santacesaria, Riccardo Tesser and Vincenzo Russo

Received: 21 February 2022

Accepted: 17 March 2022

Published: 21 March 2022

**Publisher's Note:** MDPI stays neutral with regard to jurisdictional claims in published maps and institutional affiliations.

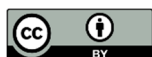

**Copyright:** © 2022 by the authors. Submitted for possible open access publication under the terms and conditions of the Creative Commons Attribution (CC BY) license (<https://creativecommons.org/licenses/by/4.0/>).

**Table S1.** Comparison of mass transfer performance between RZB in this work and that in Reference [10].

|                                       | This work                                     | Reference [10]                                |
|---------------------------------------|-----------------------------------------------|-----------------------------------------------|
| Rotor volume (cm <sup>3</sup> )       | 665                                           | 2821                                          |
| G (m <sup>3</sup> /h)                 | 0.2-1.2                                       | 10-40                                         |
| L (L/h)                               | 25-40                                         | 80-240                                        |
| N (rpm)                               | 400-1200                                      | 600-1400                                      |
| T (K)                                 | 293.15-313.15                                 | 293.15-298.15                                 |
| C (kmol/m <sup>3</sup> )              | 0.1-0.2                                       | 0.05 or 1 (NaOH), 0.87 (ethanol)              |
| $k_L$ (m/s)                           | $2.27 \times 10^{-3}$ - $4.56 \times 10^{-3}$ | $1.95 \times 10^{-3}$ - $2.94 \times 10^{-3}$ |
| $k_G$ (m/s)                           | $3.94 \times 10^{-3}$ - $8.84 \times 10^{-3}$ | $2.09 \times 10^{-2}$ - $6.70 \times 10^{-2}$ |
| $a$ (m <sup>2</sup> /m <sup>3</sup> ) | 148.72-154.88                                 | 127-338                                       |

**Table S2.** Values of individual and overall mass transfer factors in RZB.

| Item                                        | Value                                         |
|---------------------------------------------|-----------------------------------------------|
| Rotor volume (cm <sup>3</sup> )             | 665                                           |
| G (m <sup>3</sup> /h)                       | 0.2-1.2                                       |
| L (L/h)                                     | 25-40                                         |
| N (rpm)                                     | 400-1200                                      |
| T (K)                                       | 293.15-313.15                                 |
| C <sub>NaOH</sub> (kmol/m <sup>3</sup> )    | 0.1-0.2                                       |
| $k_{L-I}$ (m/s)                             | $1.26 \times 10^{-3}$ - $2.97 \times 10^{-3}$ |
| $k_{L-II}$ (m/s)                            | $2.60 \times 10^{-3}$ - $5.46 \times 10^{-3}$ |
| $k_{L-III}$ (m/s)                           | $1.43 \times 10^{-3}$ - $3.1 \times 10^{-3}$  |
| $k_L$ (m/s)                                 | $2.27 \times 10^{-3}$ - $4.56 \times 10^{-3}$ |
| $a_I$ (m <sup>2</sup> /m <sup>3</sup> )     | 16.69-21.33                                   |
| $a_{II}$ (m <sup>2</sup> /m <sup>3</sup> )  | 95.32                                         |
| $a_{III}$ (m <sup>2</sup> /m <sup>3</sup> ) | 36.68-39.4                                    |
| $a$ (m <sup>2</sup> /m <sup>3</sup> )       | 148.72-154.88                                 |
| $k_{L-I} a_I$ (1/s)                         | 0.021-0.059                                   |
| $k_{L-II} a_{II}$ (1/s)                     | 0.25-0.52                                     |
| $k_{L-III} a_{III}$ (1/s)                   | 0.053-0.12                                    |
| $k_L a$ (1/s)                               | 0.34-0.70                                     |
| $k_G$ (kmol/kPa m <sup>2</sup> s)           | $1.23 \times 10^{-6}$ - $2.85 \times 10^{-6}$ |
| $K_G a$ (kmol/kPa m <sup>3</sup> s)         | $6.86 \times 10^{-5}$ - $1.04 \times 10^{-4}$ |
